# Supplementary material for: Binary Graft of Poly(acrylic acid) and Poly(vinyl pyrrolidone) onto PDMS Films for Load and Release of Ciprofloxacin
Source: MDPI journal article supplement (doi:10.3390/polym15020302), 2023-01-06
Supplement: s1 [file s1]

# Binary Graft of Poly(acrylic acid) and Poly(vinyl pyrrolidone) onto PDMS Fims for Load and Release of Ciprofloxacin

Belén Santillán-González <sup>1</sup>, Lorena Duarte-Peña <sup>2,\*</sup>, and Emilio Bucio <sup>2,\*</sup>

<sup>1</sup> División de Ciencias Biológicas y de la Salud, Unidad Xochimilco, Universidad Autónoma Metropolitana, Calzada del Hueso 1100, Col. Villa Quietud, Delegación Coyoacán, Ciudad de México C.P. 04960 CDMX, Mexico

<sup>2</sup> Departamento de Química de Radiaciones y Radioquímica, Instituto de Ciencias Nucleares, Universidad Nacional Autónoma de México, Circuito Exterior, Ciudad Universitaria, Ciudad de México C.P. 04510 CDMX, Mexico

\* Correspondence: lorena.duarte@correo.nucleares.unam.mx (L.D.-P.); ebucio@nucleares.unam.mx (E.B.)

## 1. Ciprofloxacin quantification and Derivative Thermogravimetry

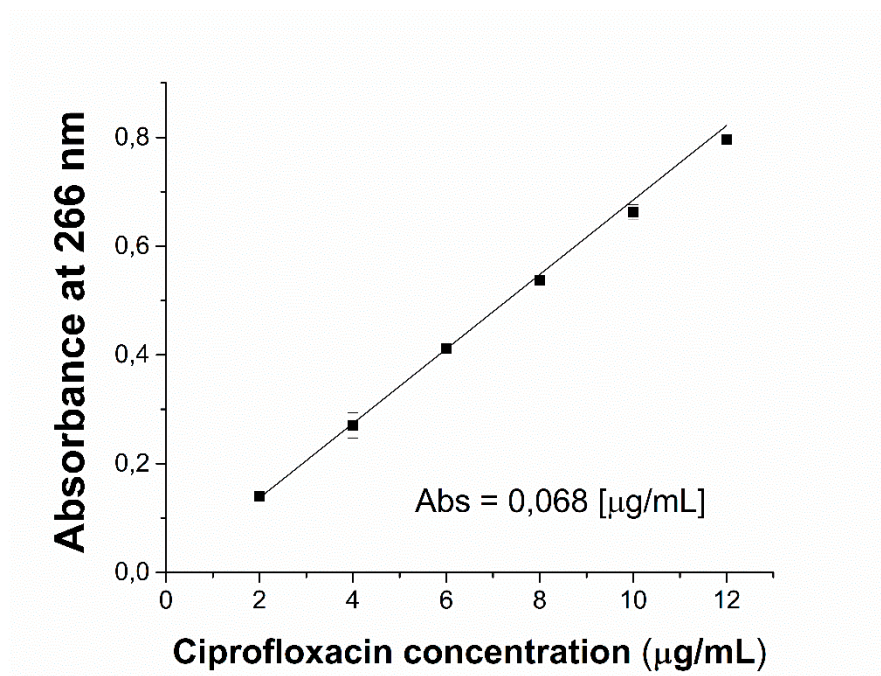

Figure S1. Calibration curves to quantify load of ciprofloxacin

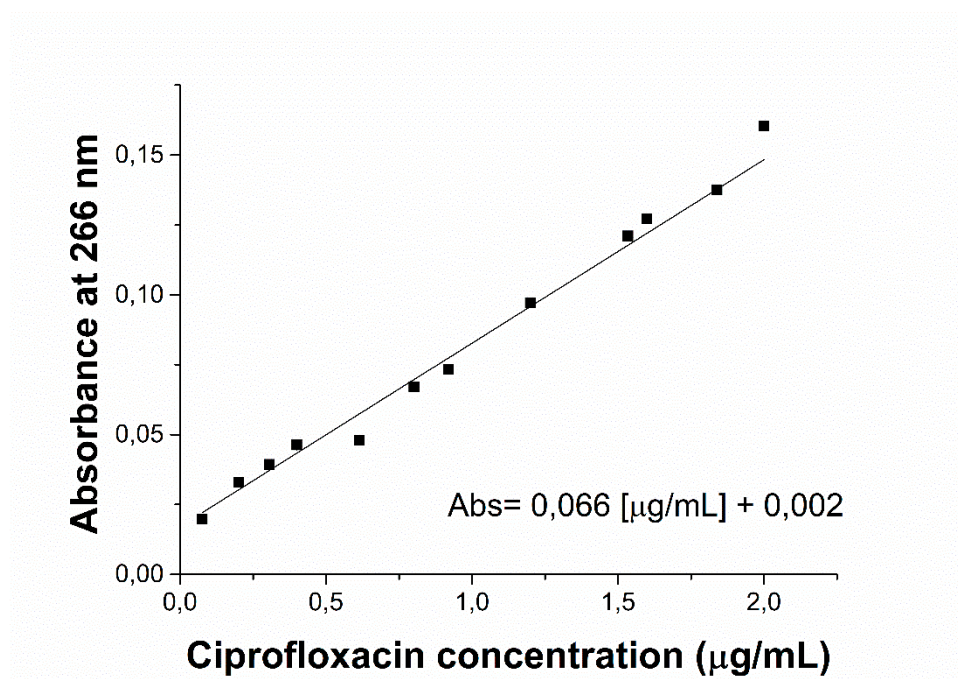

Figure S2. Calibration curves to quantify release of ciprofloxacin

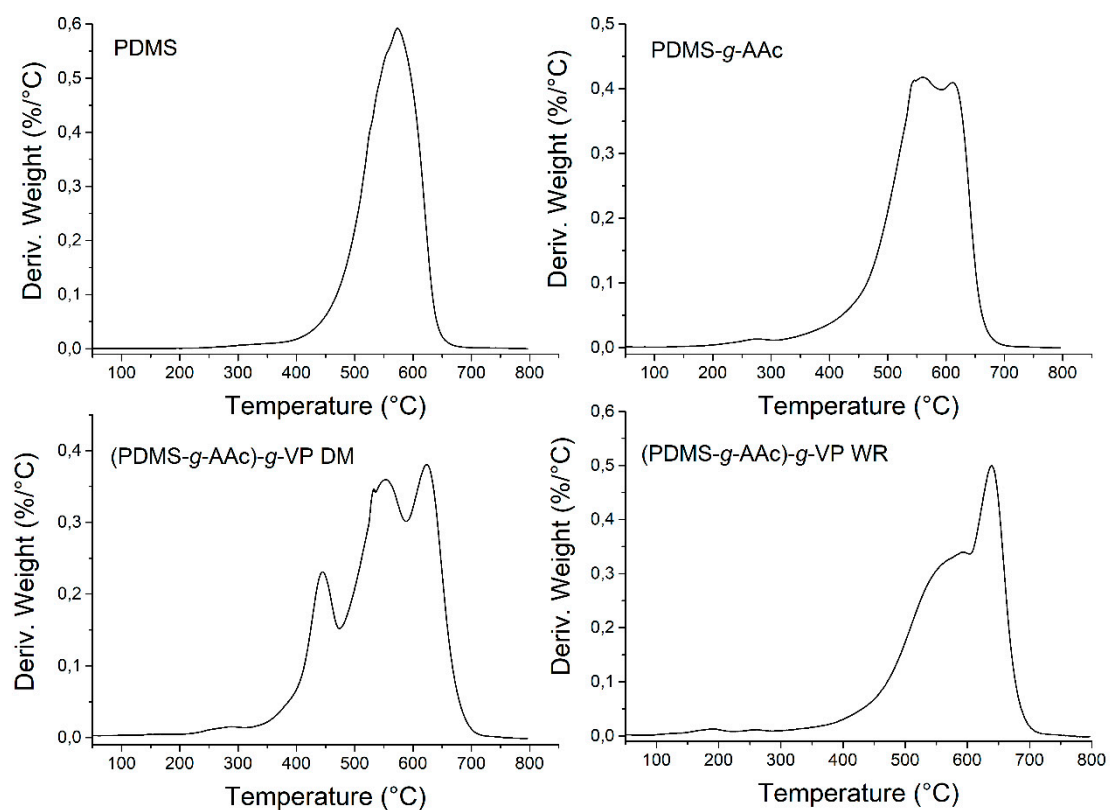

Figure S3. DTG curves
